# Supplementary material
Source: MDPI journal article supplement (https://www.mdpi.com/1996-1073/17/6/1483)
Supplement: s1 [file s1]

# **Cu-Metalated Porphyrin-Based MOFs Coupled with Anatase as Photocatalysts for CO<sub>2</sub> Reduction: The Effect of Metalation Proportion**

**Maria Anagnostopoulou <sup>1</sup>, Valérie Keller <sup>1</sup> and Konstantinos C. Christoforidis <sup>1,2,3,\*</sup>**

<sup>1</sup> Institut de Chimie et Procédés Pour l'Energie, l'Environnement et la Santé, (ICPEES)  
UMR7515 CNRS, ECPM, University of Strasbourg, 25 Rue Becquerel, Cedex 2, 67084  
Strasbourg, France;  
managnostopoulou@unistra.fr (M.A.); vkeller@unistra.fr (V.K.)

<sup>2</sup> Department of Environmental Engineering, Democritus University of Thrace, Vas. Sofias 12,  
67132 Xanthi, Greece

<sup>3</sup> Chemical Process & Energy Resources Institute, Centre for Research & Technology Hellas,  
57001 Thessaloniki, Greece

\* Correspondence: kochristo@env.duth.gr

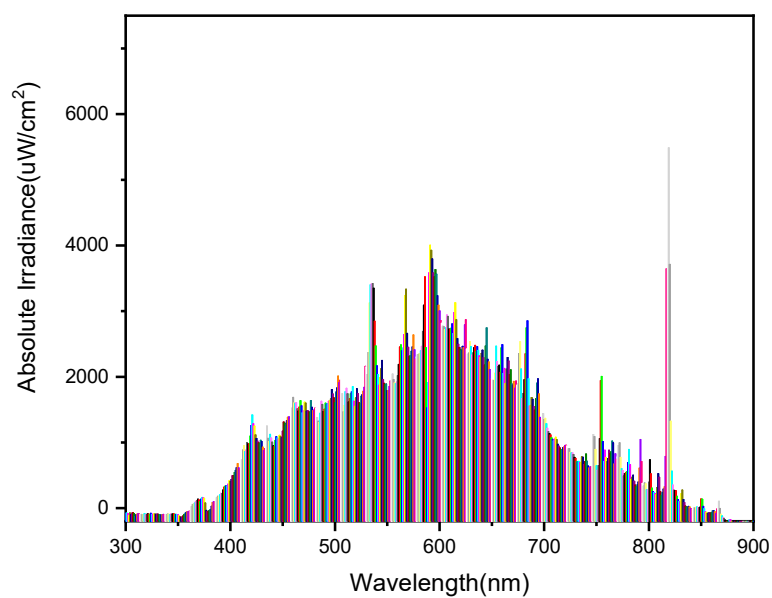

**Figure S1.** Irradiance spectra of the lamp used for the catalytic reactions.

## Supplementary Material

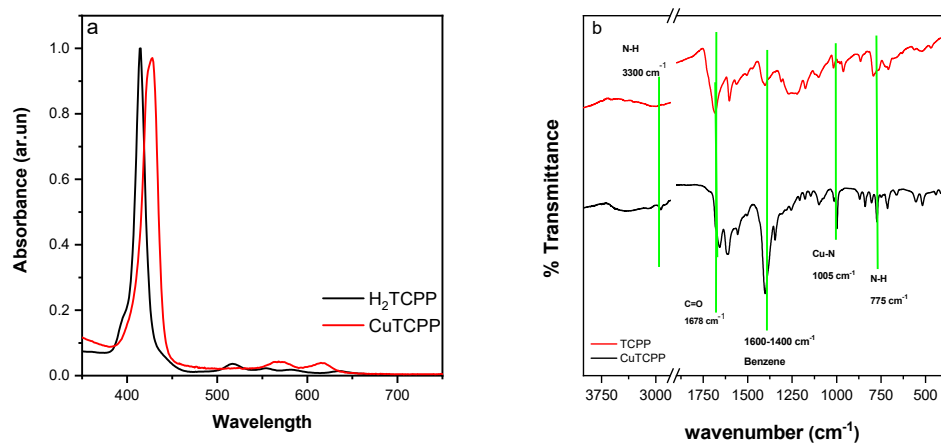

**Figure S2.** UV-Vis (a) and ATR (b) spectra of the of the free-base H<sub>2</sub>TCPP and the metalated CuTCPP complex.

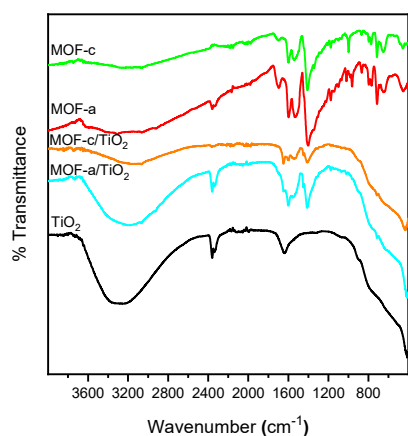

**Figure S3.** ATR spectra of TiO<sub>2</sub>, pure MOFs and composite nanomaterials.

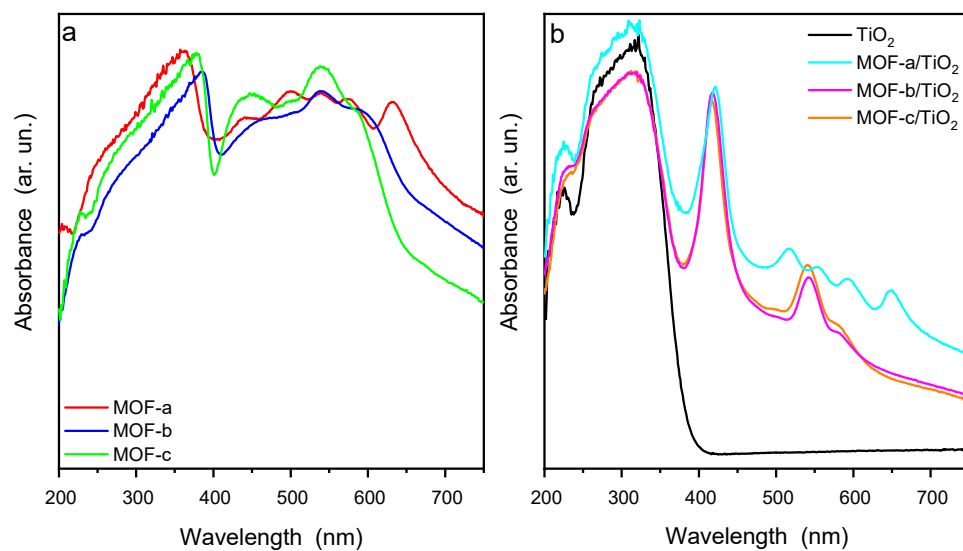

**Figure S4.** DR-UV-Vis spectra of the pure MOFs (a) and the TiO<sub>2</sub> and composite materials (b).

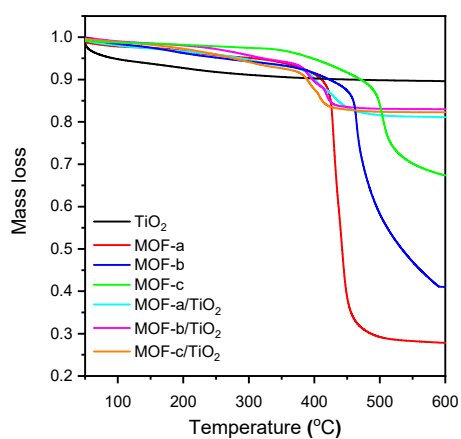

**Figure S5.** TGA profile of TiO<sub>2</sub>, synthesized MOFs and composite materials.

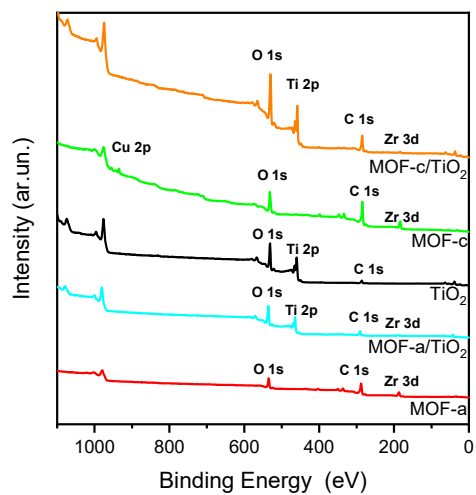

**Figure S6.** Survey spectra of TiO<sub>2</sub>, MOFs and composite materials.

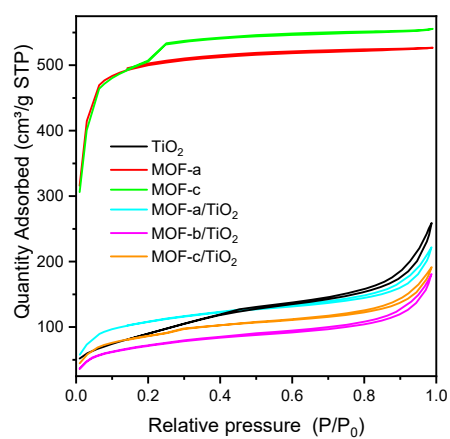

**Figure S7.** Nitrogen sorption/desorption isotherms of the prepared materials

Supplementary Material

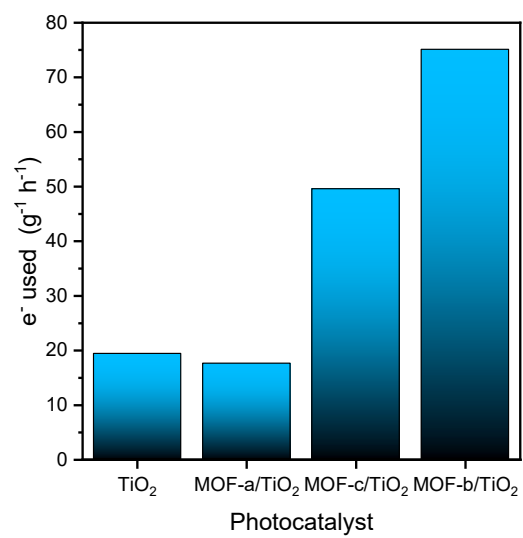

**Figure S8.** Number of e⁻ utilized by the catalysts
